# Supplementary material for: Geomorphic expressions of active rifting reflect the role of structural inheritance: A new model for the evolution of the Shanxi Rift, North China
Source: Copernicus journal article supplement (doi:10.5194/egusphere-2023-2563), 2023-11-28
Supplement: Supplementary file 1 [file egusphere-2023-2563-supplement.pdf]

## Supplementary Materials

S1 – Streamnetwork map of the normalised channel steepness of the Shanxi Rift. See Fig. 5B of the main manuscript to compare with the basin averaged  $k_{sn}$  distribution

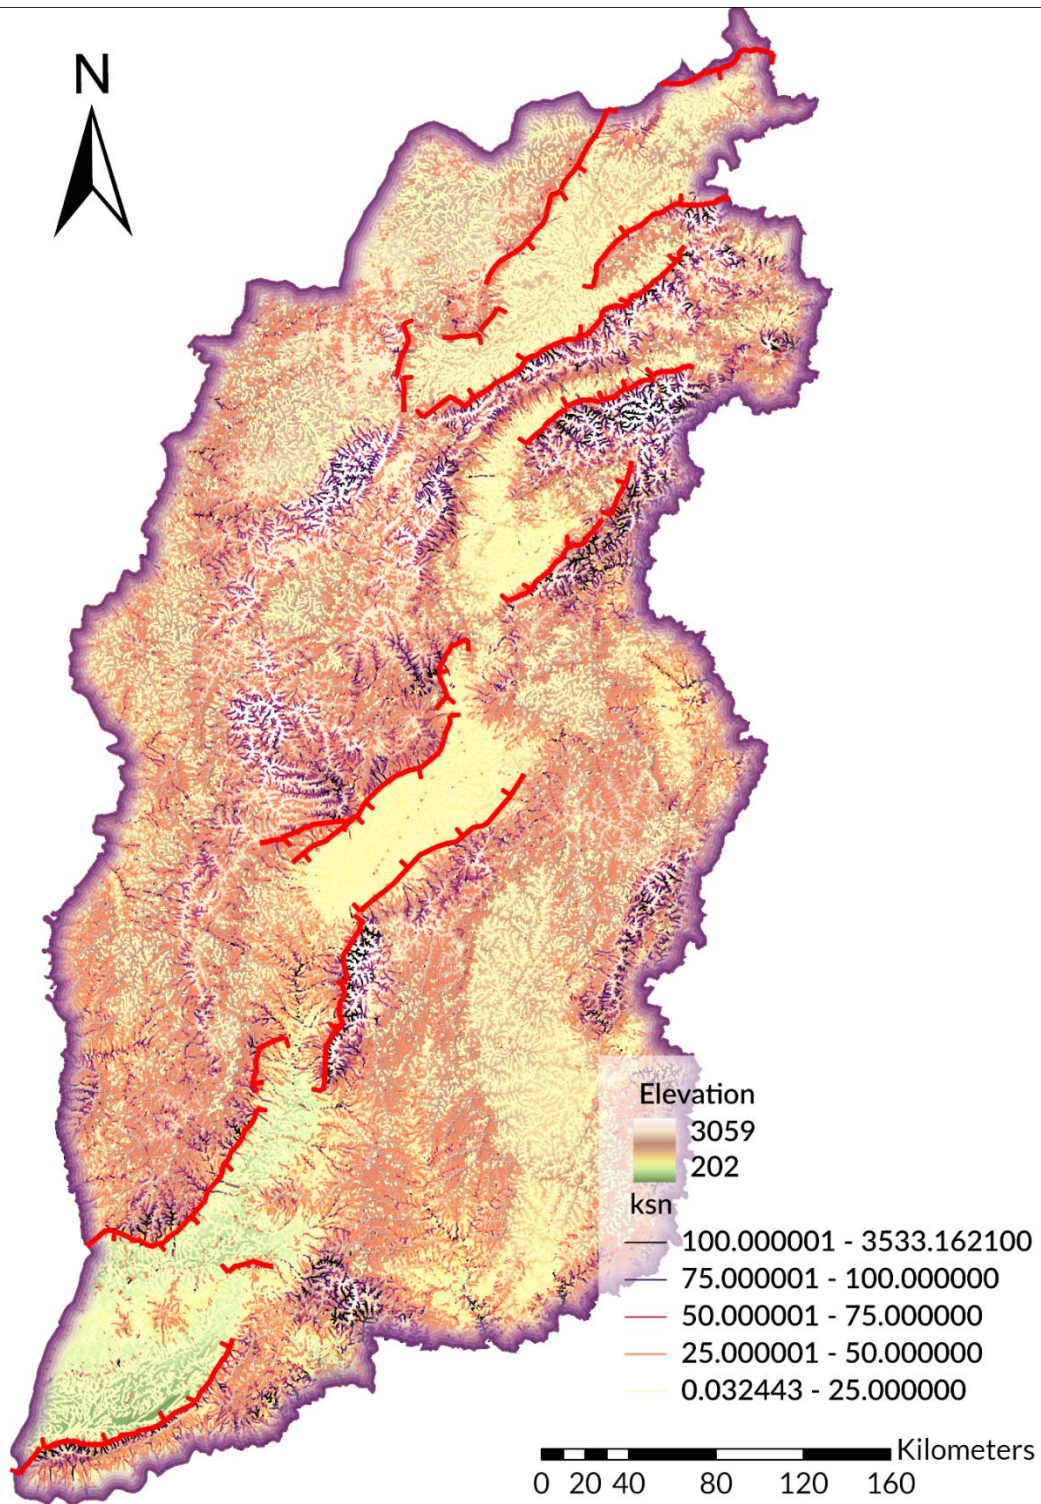



S2– Average annual precipitation of the Shanxi Rift showing little variation in precipitation across the area. Data from WoldClim2 (Fick and Hijmans, 2017)

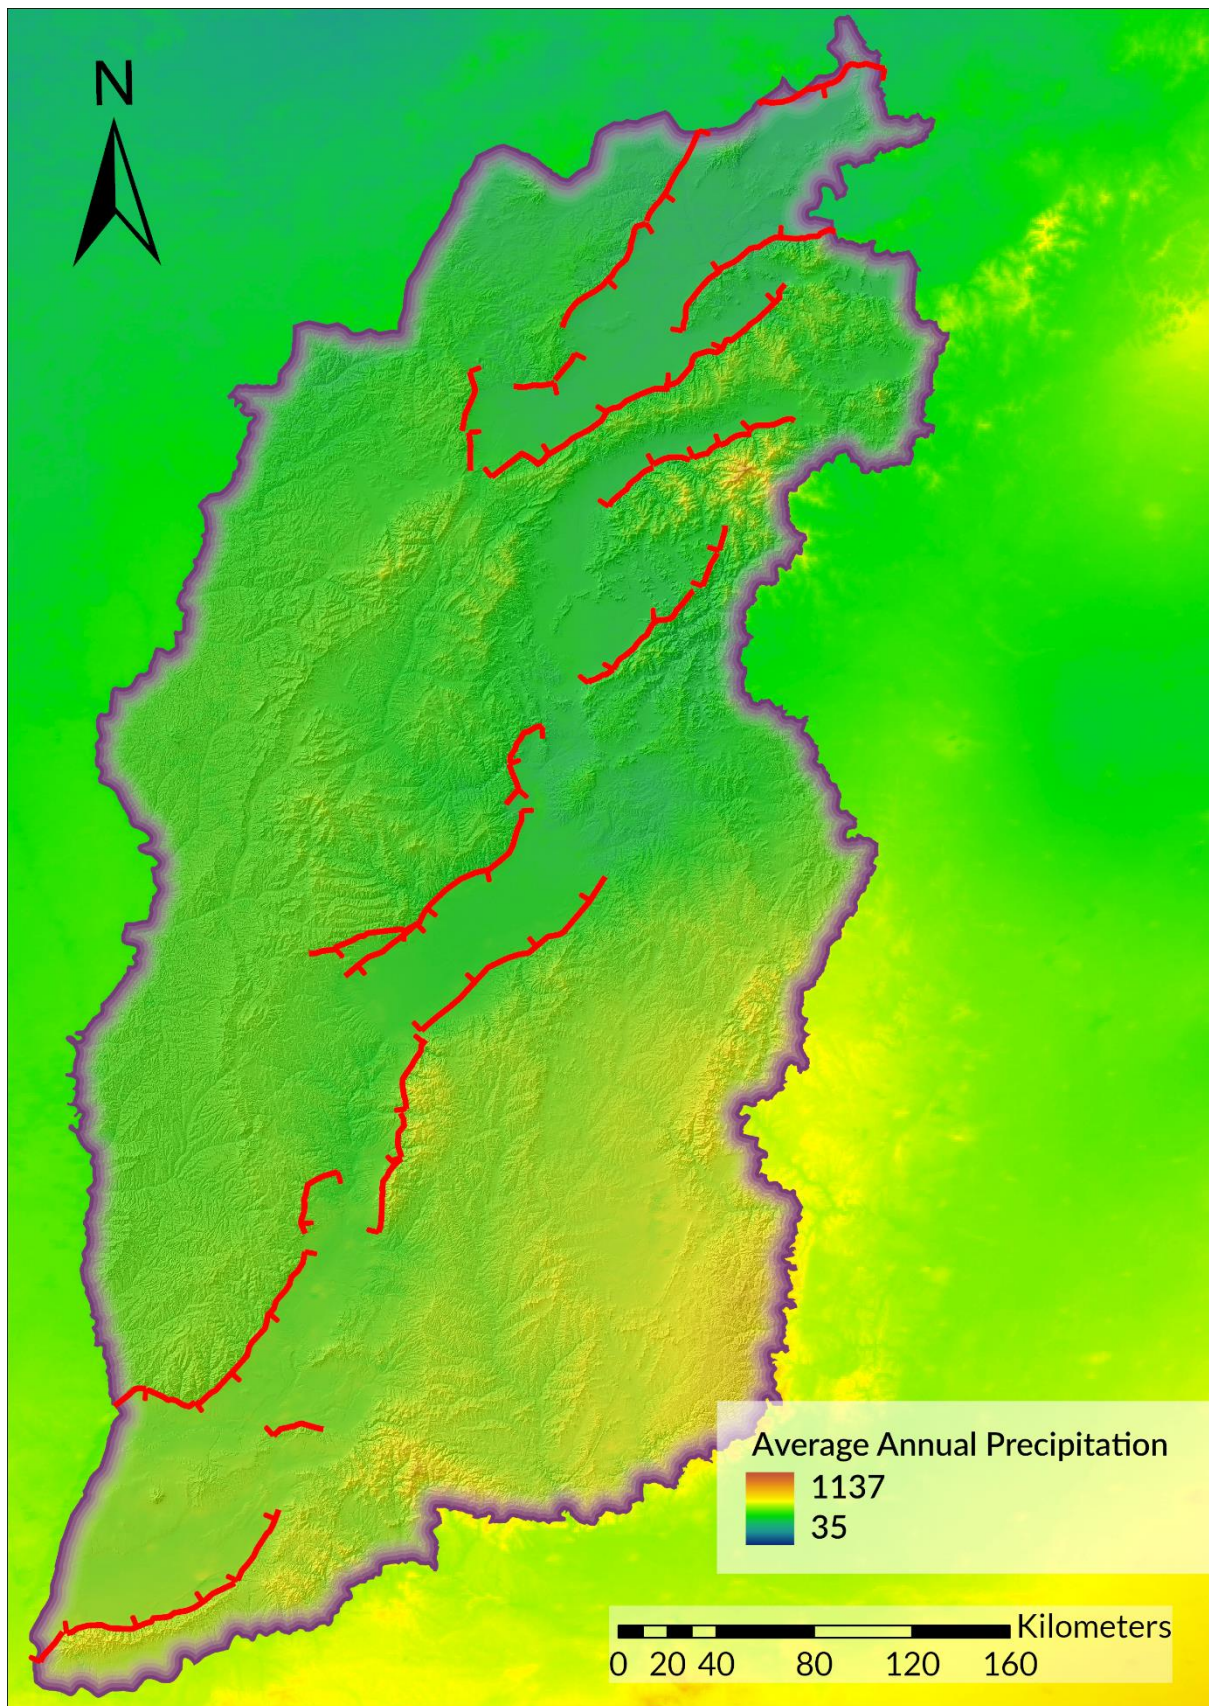



S2– Topographic map of Shanxi with fault and Earthquakes from the ISC catalogue (Storchak et al., 2013; 2015; Di Giacomo et al., 2018) shown. Note the clusters of earthquakes in the RIZs

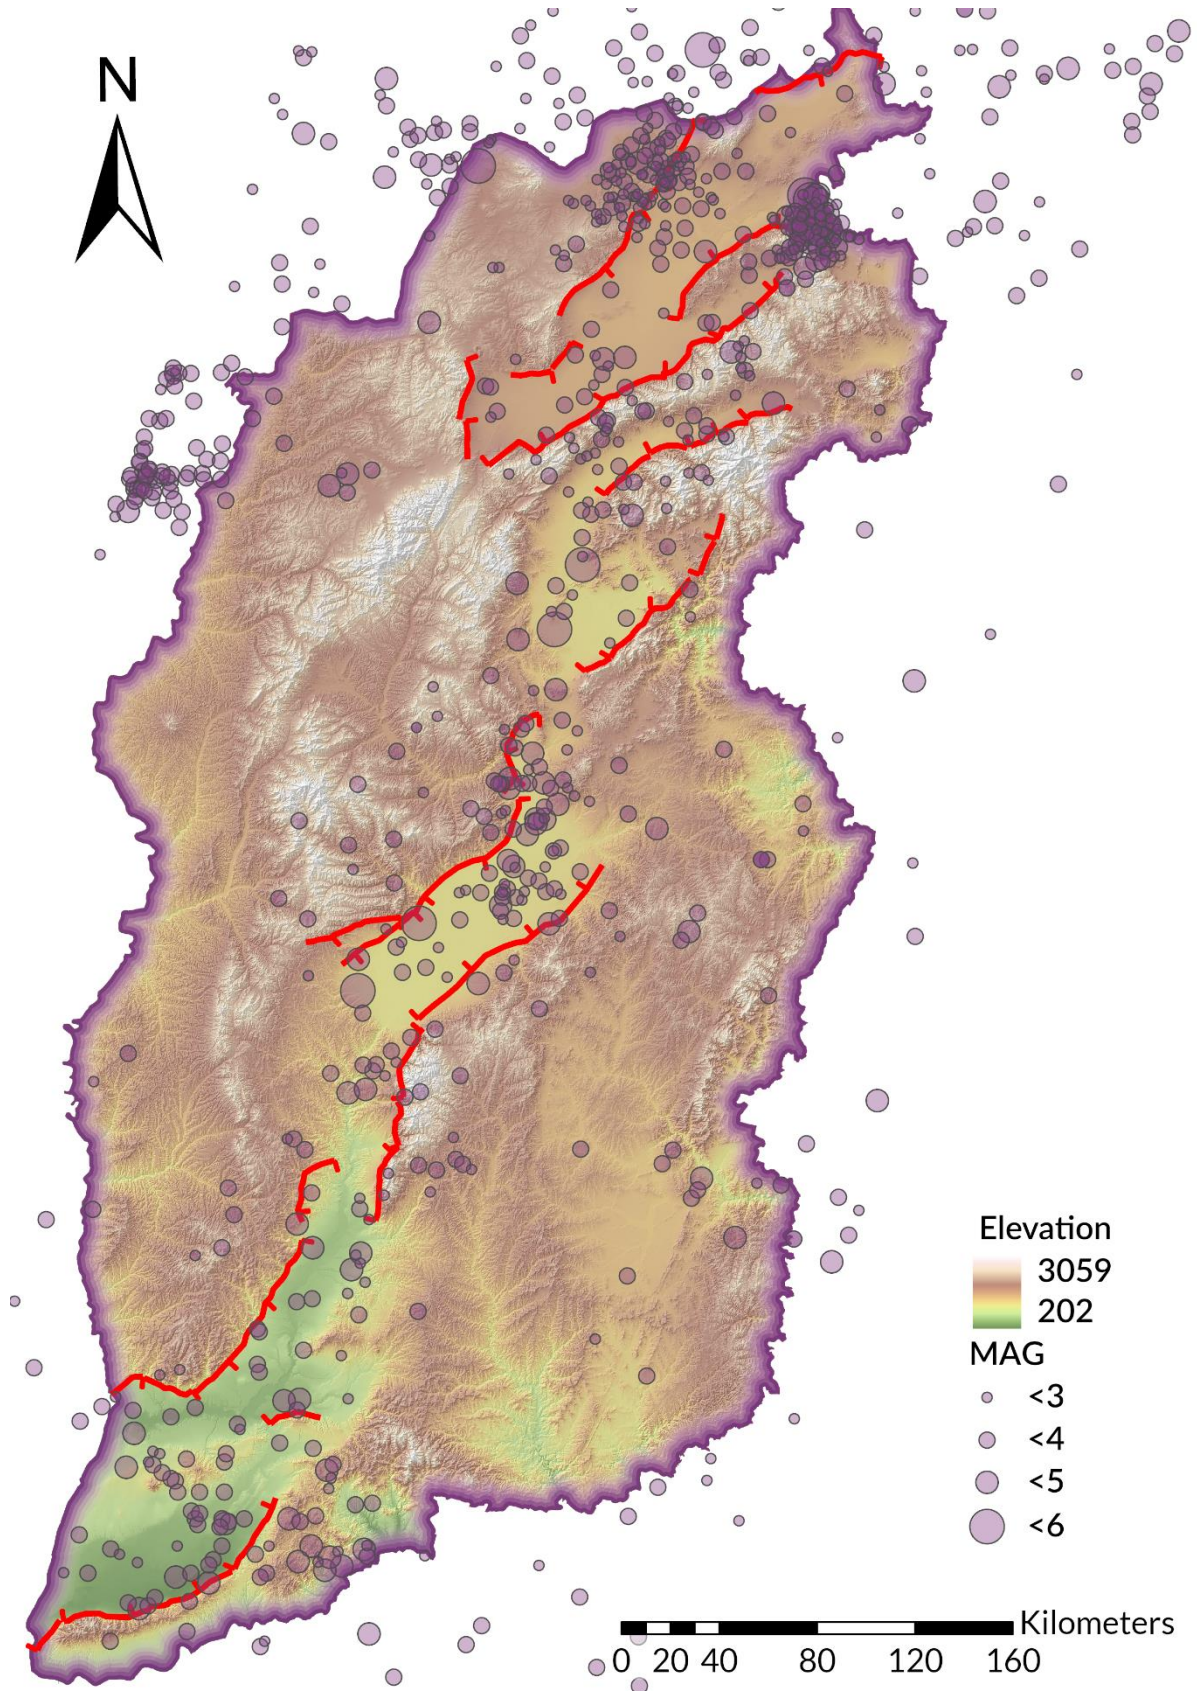

## References

- Di Giacomo, D., E.R. Engdahl and D.A. Storchak (2018). The ISC-GEM Earthquake Catalogue (1904–2014): status after the Extension Project, *Earth Syst. Sci. Data*, 10, 1877-1899, doi: 10.5194/essd-10-1877-2018.
- Fick, S.E., Hijmans, R.J., 2017. WorldClim 2: new 1-km spatial resolution climate surfaces for global land areas. *International Journal of Climatology* 37, 4302–4315.  
<https://doi.org/10.1002/joc.5086>
- Storchak, D.A., D. Di Giacomo, I. Bondár, E.R. Engdahl, J. Harris, W.H.K. Lee, A. Villaseñor and P. Bormann (2013). Public Release of the ISC-GEM Global Instrumental Earthquake Catalogue (1900-2009). *Seism. Res. Lett.*, 84, 5, 810-815, doi: 10.1785/0220130034.
- Storchak, D.A., D. Di Giacomo, E.R. Engdahl, J. Harris, I. Bondár, W.H.K. Lee, P. Bormann and A. Villaseñor (2015). The ISC-GEM Global Instrumental Earthquake Catalogue (1900-2009): Introduction, *Phys. Earth Planet. Int.*, 239, 48-63, doi: 10.1016/j.pepi.2014.06.009.
